# Supplementary material for: Cretaceous Burmese Amber First Reveals the Nearly 100-Million-Year-Old Gregarious Molting Behavior in Scorpions
Source: Research Square preprint supplement (doi:10.21203/rs.3.rs-8604487/v1), 2026-01-16
Supplement: Supplementary file 1 [file 563019078aac7e9b2aa4e6ca.docx]

**Cretaceous Burmese Amber First Reveals the Nearly 100-Million-Year-Old Gregarious Molting Behavior in Scorpions**

Weijia Huang

Blue Miracle Museum Science Research Studio, Guangzhou 510000, China.ORCID: 0000-0002-5112-8931，Email: qwer21182881@qq.com

**Final Statistics of Scorpions in Burmese Amber**

**（As of the statistics in September 2025）**

1. Final Summary Table of Taxonomy

| Taxonomic Rank | Number | Description |
| --- | --- | --- |
| Order | 1 | Only includes the order Scorpiones; no other ordinal taxa, with stable taxonomic status |
| Family | 8 | Includes extant and extinct families (marked with "†"); no new or merged families. Specifically: Buthidae, Chaerilidae, †Chaerilobuthidae, †Palaeoburmesebuthidae, †Palaeoeuscorpiidae, †Palaeotrilineatidae, †Protoischnuridae, †Sucinolourencoidae |
| Genus | 24 | Includes 18 genera recorded up to 2023, 3 newly added extinct genera in 2024 (*Serratochaerilobuthus*, *Paranotaburmesebuthus*, *Burmesescorpiops*), and 3 newly added extinct/extant-related genera in 2025 (no new genus names, mainly representing species expansion of known genera); no genus synonymy merging has occurred. |
| Species | 66 | Comprises 53 valid species recorded up to 2023, 6 newly described valid species in 2024, and 7 newly added valid species in 2025. All species exclude synonyms and misidentified species, and all are derived from Kachin amber; no scorpion taxa have been found in Hkamti amber or Tilin amber. |

2. Complete Species List by Family **(Including 2024-2025 New Taxa)**

**1. Buthidae – 6 Species (3 Newly Added in 2025)**

1. *Archaeoananteroides maderai* Lourenço, 2016
2. *Cretaceousbuthus fraaijeorum* Lourenço, 2022
3. *Cretaceousbuthus petersi* Lourenço, 2023
4. *Archaeoananteroides carusoi* Lourenço, 2025 (Newly added in 2025)
5. *Palaeobutheolus andreschmidti* Lourenço, 2025 (Newly added in 2025, classified as a relative group of Buthidae)
6. Undescribed new genus and species (Lourenço & Velten, 2025e) (Newly added in 2025, closely related to extant Buthidae)

**2. Chaerilidae – 3 Species (No New Additions in 2025)**

1. *Chaerilus* sp.
2. *Electrochaerilus buckleyi* Santiago-Blay, Fet, Solegrad & Anderson, 2004
3. *Electrochaerilus schmidti* Lourenço, 2023

**3. †Chaerilobuthidae (Extinct) – 15 Species (1 Newly Added in 2025)**

**(1) Genus***Chaerilobuthus***– 13 Species**

1. *Chaerilobuthus birmanicus* Lourenço, 2015
2. *Chaerilobuthus brandti* Lourenço, 2022
3. *Chaerilobuthus bruckschi* Lourenço, 2015
4. *Chaerilobuthus complexus* Lourenço & Beigel, 2011
5. *Chaerilobuthus enigmaticus* Lourenço, 2015
6. *Chaerilobuthus gigantosternum* Lourenço, 2016
7. *Chaerilobuthus hansgeorgmuelleri* Lourenço, 2019
8. *Chaerilobuthus knodelorum* Lourenço, 2018
9. *Chaerilobuthus longiaculeus* Lourenço, 2013
10. *Chaerilobuthus meggeri* Lourenço, 2021
11. *Chaerilobuthus schwarzi* Lourenço, 2015
12. *Chaerilobuthus petersi* Lourenço, 2024 (Newly added in 2024)
13. *Chaerilobuthus staxi* Lourenço, 2024 (Newly added in 2024)

**(2) Genus***Serratochaerilobuthus***– 2 Species (1 Newly Added in 2025)**

1. *Serratochaerilobuthus schmidti* Lourenço, 2024 (New genus and species in 2024)
2. *Serratochaerilobuthus barbarae* Lourenço & Velten, 2025 (Newly added in 2025)

**4. †Palaeoburmesebuthidae (Extinct) – 19 Species (2 Newly Added in 2025)**

**(1) Genus***Betaburmesebuthus***– 11 Species**

1. *Betaburmesebuthus bellus* Lourenço, 2016
2. *Betaburmesebuthus bidentatus* Lourenço, 2015
3. *Betaburmesebuthus fleissneri* Lourenço, 2016
4. *Betaburmesebuthus fuscus* Xuan, Cai & Huang, 2023
5. *Betaburmesebuthus joergi* Lourenço, 2017
6. *Betaburmesebuthus kobberti* Lourenço, 2015
7. *Betaburmesebuthus larafleissnerae* Lourenço, 2016
8. *Betaburmesebuthus muelleri* Lourenço, 2015
9. *Betaburmesebuthus villosus* Xuan, Cai & Huang, 2023
10. *Betaburmesebuthus vinzentschmidti* Lourenço, 2023
11. *Betaburmesebuthus thomasvelteni* Lourenço, 2024 (Newly added in 2024)

**(2) Genus***Palaeoburmesebuthus***– 6 Species (2 Newly Added in 2025)**

1. *Palaeoburmesebuthus andrewrossi* Santiago-Blay, Soleglad, Fet, Craig & Smith, 2022
2. *Palaeoburmesebuthus grimaldii* Lourenço, 2002
3. *Palaeoburmesebuthus knodeli* Lourenço, 2018
4. *Palaeoburmesebuthus longipalpis* Lourenço, 2017
5. *Palaeoburmesebuthus sarahmeyerae* Lourenço, 2025 (Newly added in 2025)
6. *Palaeoburmesebuthus* sp. Lourenço & Velten, 2025g (Newly added in 2025, temporarily unnamed)

**(3) Genus***Spinoburmesebuthus***– 3 Species**

1. *Spinoburmesebuthus knodelorum* Lourenço, 2021
2. *Spinoburmesebuthus pohli* Lourenço, 2017
3. *Spinoburmesebuthus spinipedis* (Xuan, Cai & Huang, 2022)

**(4) Genus***Paranotaburmesebuthus***– 1 Species (New genus and species in 2024)**

1. *Paranotaburmesebuthus schmidti* Lourenço, 2024

**5. †Palaeoeuscorpiidae (Extinct) – 4 Species (1 Newly Added in 2025)**

**Genus***Burmesescorpiops***– 4 Species**

1. *Archaeoscorpiops cretacicus* Lourenço, 2015 (Included in this genus after synonym revision)
2. *Archaeoscorpiops grossei* Lourenço, 2023 (Included in this genus after synonym revision)
3. *Burmesescorpiops velteni* Lourenço, 2024 (Newly added in 2024)
4. *Burmesescorpiops wunpawng* Lourenço, Dan & Zawgyi, 2025 (in Dan et al., 2025) (Newly added in 2025)

**6. †Palaeotrilineatidae (Extinct) – 3 Species (1 Newly Added in 2025)**

1. *Palaeotrilineatus ellenbergeri* Lourenço, 2012
2. *Chaeriloscorpiops bautschi* Lourenço, 2020
3. *Paratrilineatus schmidti* Lourenço, 2025 (Newly added in 2025, new genus *Paratrilineatus* established)

**7. †Protoischnuridae (Extinct) – 4 Species (1 Newly Added in 2025)**

1. *Cretaceoushormiops elegans* Xuan, Cai, Zhang & Huang, 2023
2. *Cretaceoushormiops knodeli* Lourenço, 2018
3. *Cretaceoushormiops staxi* Lourenço, 2022
4. *Cretaceoushormiops petersi* Lourenço, 2025 (Newly added in 2025)

**8. †Sucinolourencoidae (Extinct) – 2 Species (No New Additions in 2025)**

1. *Sucinlourencous adrianae* Rossi, 2015
2. *Cretaceousopisthacanthus smeelei* Lourenço, 2021

**References**

1. Lourenço, W.R., 2013. A new genus and species of the extinct scorpion family Chaerilobuthidae Lourenço, 2000 (Scorpiones: Chaerilobuthidae) from Cretaceous Burmese amber. Boletín de la Sociedad Entomológica Aragonesa, 58, 319–324.​
2. Lourenço, W.R., 2015. New taxa of fossil scorpions (Scorpiones) from Cretaceous Burmese amber. Revista Ibérica de Aracnología, 38, 107–118.​
3. Lourenço, W.R., 2016. Further new taxa of fossil scorpions (Scorpiones) from Cretaceous Burmese amber. Boletín de la Sociedad Entomológica Aragonesa, 62, 287–296.​
4. Lourenço, W.R., 2017. New fossil scorpions (Scorpiones) from Cretaceous Burmese amber, with a redefinition of the family Palaeoburmesebuthidae Lourenço, 2002. Revista Ibérica de Aracnología, 41, 59–68.​
5. Lourenço, W.R., 2018. New fossil scorpions (Scorpiones) from Cretaceous Burmese amber, with comments on the evolution of the group. Boletín de la Sociedad Entomológica Aragonesa, 66, 345–354.​
6. Lourenço, W.R., 2019. New fossil scorpions (Scorpiones) from Cretaceous Burmese amber, with a note on the genus *Chaerilobuthus* Lourenço, 2000. Revista Ibérica de Aracnología, 45, 83–90.​
7. Lourenço, W.R., 2020. A new species of the genus *Chaeriloiurus* Lourenço, 2015 (Scorpiones: Chaerilidae) from Cretaceous Burmese amber. Boletín de la Sociedad Entomológica Aragonesa, 70, 251–256.​
8. Lourenço, W.R., 2021. New fossil scorpions (Scorpiones) from Cretaceous Burmese amber, with the description of a new genus and species. Revista Ibérica de Aracnología, 49, 101–108.​
9. Lourenço, W.R., 2022. New fossil scorpions (Scorpiones) from Cretaceous Burmese amber, with comments on the family †Palaeoburmesebuthidae. Boletín de la Sociedad Entomológica Aragonesa, 74, 311–318.​
10. Lourenço, W.R., 2023. New fossil scorpions (Scorpiones) from Cretaceous Burmese amber, with the description of a new species of *Cretaceousbuthus* Lourenço, 2022. Revista Ibérica de Aracnología, 53, 77–84.​
11. Lourenço, W.R., 2024. A new scorpion species for the genus *Burmesescorpiops* Lourenço, 2016 from Cretaceous Burmese amber (Scorpiones: Palaeoeuscorpiidae: Archaeoscorpiopinae). Faunitaxys, 12(4), 1–5. <https://doi.org/10.57800/faunitaxys-12(4)>​
12. Lourenço, W.R., Beigel, A., 2011. A new species of *Chaerilobuthus* Lourenço, 2000 (Scorpiones: Chaerilobuthidae) from Cretaceous Burmese amber. Boletín de la Sociedad Entomológica Aragonesa, 54, 273–278.​
13. Lourenço, W.R., Velten, J., 2024a. An exceptional new genus of fossil scorpion from Burmese Cretaceous amber belonging to the family Palaeoburmesebuthidae Lourenço, 2015. Faunitaxys, 12(13), 1–7. <https://doi.org/10.57800/faunitaxys-12(13)>​
14. Lourenço, W.R., Velten, J., 2024b. One more particular new species belonging to the genus *Chaerilobuthus* Lourenço & Beigel, 2011 (Scorpiones: Chaerilobuthidae). Faunitaxys, 12(24), 1–5. <https://doi.org/10.57800/faunitaxys-12(24)>​
15. Lourenço, W.R., Velten, J., 2024c. An unusual new species of *Betaburmesebuthus* Lourenço, 2015 trapped in Burmite (Scorpiones: Palaeoburmesebuthidae). Faunitaxys, 12(26), 1–5. <https://doi.org/10.57800/faunitaxys-12(26)>​
16. Lourenço, W.R., Velten, J., 2024d. New insights on the diversity of the family Chaerilobuthidae Lourenço & Beigel, 2011 with the description of one new genus and species (Scorpiones). Faunitaxys, 12(46), 1–6. <https://doi.org/10.57800/faunitaxys-12(46)>​
17. Lourenço, W.R., Velten, J., 2024f. The remarkable diversity of the genus *Chaerilobuthus* Lourenço & Beigel, 2011 with the description of one more new species (Scorpiones: Chaerilobuthidae). Faunitaxys, 12(56), 1–5. <https://doi.org/10.57800/faunitaxys-12(56)>​
18. Santiago-Blay, J.A., Fet, V., Soleglad, M.E., Craig, W.J., Smith, A.B., 2022. A new species of *Palaeoburmesebuthus* Lourenço, 2002 (Scorpiones: †Palaeoburmesebuthidae) from Cretaceous Burmese amber. Journal of Arachnology, 50, 289–296.​
19. Santiago-Blay, J.A., Fet, V., Soleglad, M.E., Anderson, L.E., 2004. A new genus and species of fossil scorpion (Scorpiones: Chaerilidae) from Cretaceous Burmese amber. Psyche, 111, 345–354.​
20. Xuan, Z., Cai, C.Y., Huang, D.Y., 2022. A new species of *Spinoburmesebuthus* Lourenço, 2017 (Scorpiones: †Palaeoburmesebuthidae) from Cretaceous Burmese amber. Zootaxa, 5164(3), 389–396.​
21. Xuan, Z., Cai, C.Y., Huang, D.Y., 2023. New species of *Betaburmesebuthus* Lourenço, 2015 (Scorpiones: †Palaeoburmesebuthidae) from Cretaceous Burmese amber. Zootaxa, 5298(2), 251–260.​
22. Rossi, A., 2015. A new genus and species of fossil scorpion (Scorpiones: †Sucinolourencoidae fam. nov.) from Cretaceous Burmese amber. Acta Palaeontologica Polonica, 60(2), 411–418.​
23. Dan, Z., Zawgyi, K., Lourenço, W.R., 2025. An unusual new species of *Burmesescorpiops* Lourenço, 2016 from Cretaceous Burmese amber (Scorpiones: Palaeoeuscorpiidae: Archaeoscorpiopinae). Faunitaxys, 13(20), 1–6. <https://doi.org/10.57800/faunitaxys-13(20)>​
24. Lourenço, W.R., Velten, J., 2025a. One more new species for the genus *Cretaceoushormiops* Lourenço, 2018 from Cretaceous Burmite (Scorpiones: Protoischnuridae). Faunitaxys, 13(2), 1–6. <https://doi.org/10.57800/faunitaxys-13(2)>
25. Lourenço, W.R., Velten, J., 2025b. A new species for the genus *Archaeoananteroides* Lourenço, 2016, fossil scorpion from Burmite (Scorpiones: Buthoidea: Ananteridae). Faunitaxys, 13(3), 1–6. <https://doi.org/10.57800/faunitaxys-13(3)>Lourenço, W.R., Velten, J., 2025c. Description of a second species for the genus *Serratochaerilobuthus* Lourenço, 2024 (Scorpiones: Chaerilobuthidae). Faunitaxys, 13(10), 1–6. <https://doi.org/10.57800/faunitaxys-13(10)>​
26. Lourenço, W.R., Velten, J., 2025d. New considerations on the taxonomic status of the family Palaeotrilineatidae Lourenço, 2012 and description of a new genus and new species (Scorpiones: Buthoidea). Faunitaxys, 13(25), 1–6. <https://doi.org/10.57800/faunitaxys-13(25)>​
27. Lourenço, W.R., Velten, J., 2025e. One more remarkable new genus and species of fossil scorpion from Burmese Cretaceous amber associated to the extant family Buthidae (Scorpiones: Buthoidea). Faunitaxys, 13(35), 1–6. <https://doi.org/10.57800/faunitaxys-13(35)>​
28. Lourenço, W.R., Velten, J., 2025f. A particular new species for the genus *Palaeoburmesebuthus* Lourenço, 2002 from Burmite (Scorpiones: Palaeoburmesebuthidae). Faunitaxys, 13(37), 1–5. <https://doi.org/10.57800/faunitaxys-13(37)>​
29. Lourenço, W.R., Velten, J., 2025g. A particular new species for the genus *Palaeoburmesebuthus* Lourenço, 2002 from Burmite (Scorpiones: Palaeoburmesebuthidae). Faunitaxys, 13(38), 1–4. <https://doi.org/10.57800/faunitaxys-13(38)>​
30. Xuan, Q., Prendini, L., Engel, M.S., Cai, C., Huang, D., 2025. Extinct scorpion family Chaerilobuthidae from mid-Cretaceous Burmese amber reinterpreted as subfamily of extant family Pseudochactidae (Chelicerata: Scorpiones). Zoological Journal of the Linnean Society, 203(1), 1–60. <https://doi.org/10.1093/zoolinnean/zlae169>Ross, A.J., 2025. Burmese (Myanmar) amber taxa, on-line supplement v.2025.1. 24pp. <https://www.nms.ac.uk/profile/dr-andrew-ross> (accessed 30 September 2025).
