# Supplementary figures and images for: Cretaceous Burmese Amber First Reveals the Nearly 100-Million-Year-Old Gregarious Molting Behavior in Scorpions
Source: Research Square preprint supplement (doi:10.21203/rs.3.rs-8604487/v1), 2026-01-16

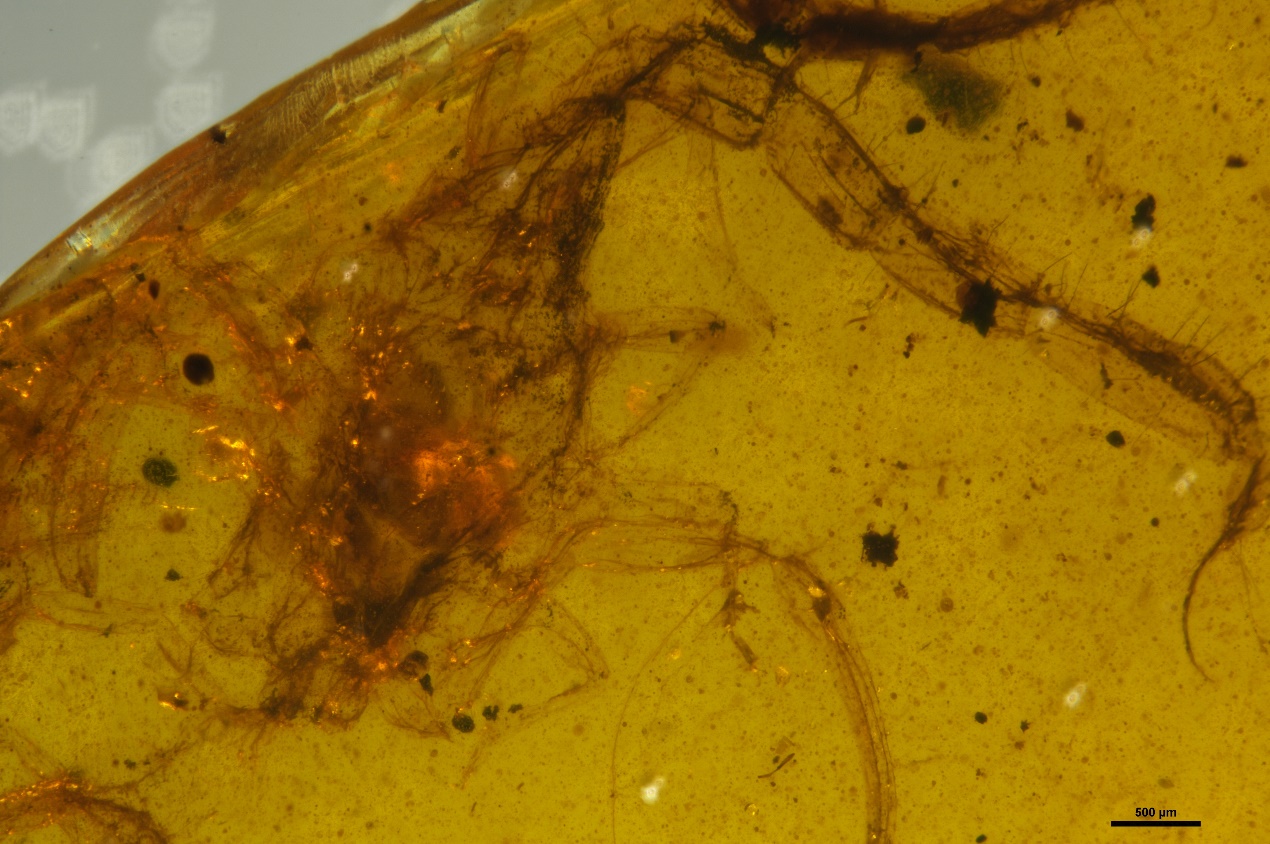


Fig 8. Optical microscope image of BMM 4772 specimen


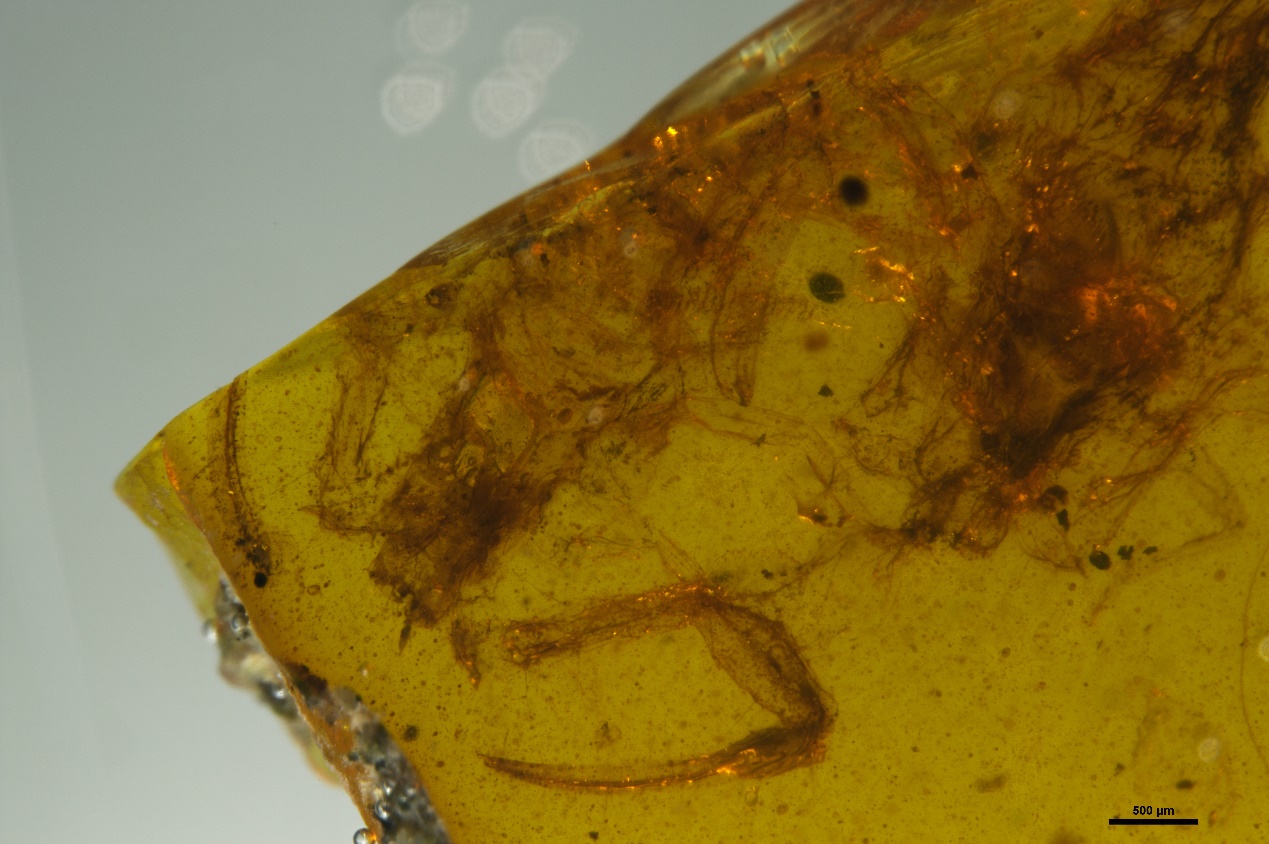


Fig 9：Optical microscope image of BMM 4772 specimen

Supplement: Supplementary file 2 [file f4b9f18e689275f38122bfd7.docx]
